# Supplementary material for: Unfolding the relationship between seasonal forecast skill and value in hydropower production: a global analysis
Source: Copernicus journal article supplement (doi:10.5194/hess-26-2431-2022), 2022-05-09
Supplement: Supplementary file 1 [file hess-26-2431-2022-supplement.pdf]

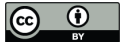

*Supplement of*

## **Unfolding the relationship between seasonal forecast skill and value in hydropower production: a global analysis**

**Donghoon Lee et al.**

*Correspondence to:* Stefano Galelli ([stefano\\_galelli@sutd.edu.sg](mailto:stefano_galelli@sutd.edu.sg))

The copyright of individual parts of the supplement might differ from the article licence.

# Supplement

## 1 Introduction

This supplement includes seven text sections (Texts S1–S7), five figures (Figures S1–S5), and six tables (Tables S1–S6). Text S1 describes the DEM-based procedure adopted for estimating the elevation-area-storage curve for a subset of  $\sim 200$  reservoirs, while Figure S1 illustrates the impact of the bathymetry estimation procedure on the  $I_{PF}$  and  $I_{DF}$  values attained by these  
5 reservoirs. Text S2 provides the definition of mean squared error skill score (MSESS) and Gerrity skill score (GSS), while Figure S2 illustrates their values. Text S3 provides further explanations on the weekly operations of a subset of hydropower dams. Text S4–S5 and Table S1–S6 provide additional details on the regression modelling exercise used to characterize the relationship between reservoir design specifications, forecast skill, and forecast value. Figure S3 illustrates the correlation  
10 between inflow and the seven potential predictors for each of the 735 dams. Text S6 and Figure S4 investigate the relationship between reservoir performance and the speed with which forecast skill decreases. Text S7 and Figure S5 illustrate the relationships between hydro-climate characteristics and forecast skills. All simulations results analyzed in this study are available on HydroShare at <http://www.hydroshare.org/resource/ca365ffb1a1f49df8b77e393be965fd8>.

**Text S1.** The bathymetry of each reservoir is estimated using the 90-m resolution digital elevation model (DEM), flow direction, and upstream area retrieved from the Multi-Error-Removed Improved-Terrain (MERIT) – Hydro dataset (Yamazaki et al., 2019). The methodology generally follows Vu et al. (2021). First, we isolate the DEM data with the contour corresponding to maximum water level and dam crest line. Then, for each 1-m elevation change in the DEM, we calculate the corresponding water surface area. Using these data on elevation and area, we calculate the storage volume for each 1-m elevation increment (using a trapezoidal approximation), ultimately resulting in the elevation-area-storage (EAS) curve. After having estimated the EAS curves of all 735 dams, we select the 203 reservoirs with errors within 10% and 20% of the maximum dam height and maximum storage capacity reported in the GRand database, respectively. On average, the 203 dams show a 2.5% difference in maximum capacity and a 5.5% difference in maximum dam height.

**Text S2.** The mean squared error skill score (MSESS) is a deterministic skill score that compares the MSE of prediction model and climatology. It is defined as follows (Wilks, 2011):

$$MSESS = \left( 1 - \frac{MSE_{pred}}{MSE_{clim}} \right), \quad (1)$$

where  $MSE_{pred}$  and  $MSE_{clim}$  are the MSE associated to the predictive model and climatological mean prediction, respectively. The perfect score of the MSESS is 1, while a value equal to 0 indicates that the model skill is equal to that of the climatology.

The Gerrity skill score (GSS) is a multi-categorical skill score that rewards correct predictions in rarer categories. The GSS is calculated as follows:

$$GSS = \sum_{i=1}^3 \sum_{j=1}^3 p_{ij} s_{ij}, \quad (2)$$

where  $p_{ij}$  is the joint probability of inflow in each category  $(i, j)$  of a contingency table (3 x 3 in this study) and  $s_{ij}$  is a scoring weight to yield more or less credits based on the frequency of the category (Wilks, 2011). The three categories correspond to the upper, middle, and lower thirds of the inflow observed in the period 1958–2000. The GSS ranges from -1 to 1, where a value of 1 represents a perfect forecast and a value of 0 means no predictive skill (compared to the climatology).

The MSESS and GSS values calculated during the validation process are illustrated in Figure S2. In general, models with a shorter lead-time present higher skills. As indicated in Section 3.1, the climatological mean prediction is applied instead when the MSESS or GSS value is less than 0 (e.g., yellow dots in Figure S2 panel (a)). This occurs 27% and 37% of the time (for MSESS and GSS, respectively) across all MP models.

**Text S3.** We perform reservoir operations at the weekly scale for 94 dams with time-to-fill (ratio of storage capacity to mean monthly inflow) lower than 2 months. To do so, we first obtain the daily inflow time series from 1958 to 1967 from the Water and Global Change (WATCH) 20<sup>th</sup> century Model Output (Weedon et al., 2011), generated by the global hydrological model

WaterGAP (Alcamo et al., 2003). We then aggregate the daily inflow into weeks of 7-8 days (depending on the number of days  
 45 in the month) such that each month is represented by 4 weeks. We then disaggregate each monthly inflow (from 1958 to 2000)  
 into 4 weekly inflows using the  $k$ -nearest neighbors algorithm (Nowak et al., 2010). The neighbors are identified from the  
 1958-1967 weekly flows. For each monthly inflow (1958 to 2000), one of the  $k$ -nearest neighbors is resampled using a weight  
 metric that gives higher weight to the closest neighbour. The monthly inflow is then disaggregated according to the weekly  
 proportion vector corresponding to the selected neighbor. The disaggregation of each month's inflow is independent of inflow  
 50 from previous or future months. Forecast inflows are also disaggregated into weekly inflows such that the forecast horizon for  
 forecast-informed schemes is equal to 28 weeks.

**Text S4.** To explain the impact of dam design specifications on the value of perfect forecasts, we first define 40 potential pre-  
 dictors for each dam. These predictors relate to the dam design specifications (e.g., storage capacity, maximum turbine release  
 55 rate), inflow characteristics (e.g., mean and standard deviation of monthly inflow), or a combination thereof (e.g., ratio of ca-  
 pacity to inflow, or time-to-fill). Next, we find the correlation between these variables and  $I_{PF}$ . Table S1 lists the five variables  
 that have correlation (absolute value) with  $I_{PF}$  greater than 0.25. Since the first three variables are correlated (all related to  
 hydraulic head and depth), we only use  $x_{depth}$  in the modelling exercise. We then want to find design specifications that con-  
 tribute to forecast value substantially. Linear regression is not best suited for this purpose, since predictors would explain small  
 60 differences in  $I_{PF}$  values in which we are not interested. Hence, we perform a logistic regression exercise and divide the dams  
 into two broad groups using the mean  $I_{PF}$  value across all dams as a cut-off. The cross-validation performance attained by  
 logistic regression models using different combinations of predictors is shown in Table S2. We select the model with predictors  
 $x_{depth}$  and  $x_{fill}$  and explain it in further details in the main paper. In Table S3, we show the modelling results obtained when  
 adopting a different threshold to divide the dams into the two groups.

65  
**Text S5.** To explain the impact of forecast skills and design specifications on the value of realistic forecasts, we use the same  
 40 potential predictors described in Text S2 and another 23 variables characterizing the forecast skill of each inflow forecast  
 model (Dawson et al., 2007). Similar to the previous analysis, we then calculate the correlation between these variables and  
 the performance gain  $I$ . Table S4 shows the 14 variables that have correlation (absolute value) with  $I$  greater than 0.25. Seven  
 70 of these variables are dam or inflow related, while the other seven reflect forecast skill.

Table S4 shows that KGE does not appear in the group of variables strongly correlated with  $I$ . Yet, one might expect that  
 KGE and its components may provide meaningful characteristics of forecasts. To investigate this matter, we looked into the  
 correlation between the performance gain  $I$ , KGE, and its components (i.e.,  $r$ ,  $\beta$ , and  $\gamma$ ). As shown in Table S5, the correlation  
 75 drops with longer lead-times, which is expected, suggesting that better prediction for immediate months tends to lead to higher  
 forecast value. However, this trend is not observed for the bias ratio ( $\beta$ ), which suggests that accurate prediction in inflow  
 volumes for all seven future months contributes to higher forecast value. However, the correlation values here are still lower

compared to other indicators of forecast skill presented in Table S4.

80 With the variables listed in Table S4, we then perform an exhaustive search to find the best linear regression model with 2-to-5 predictors. The results are shown in Table S6. The model with two variables is explained in greater details in the main paper. The model with five variables includes both  $x_{high}$  and  $x_{hurst}$ , suggesting that the persistence of inflow is correlated to the value of realistic forecasts.

85 **Text S6.** To investigate whether the speed with which forecast skill decreases may play a role in our analysis, we first fit a linear regression between KGE and prediction lead time for each of the 269 dams classified as *cases* (or *success*). We then use the slope of the regression to represent the speed with which forecast skill decreases (i.e., a highly negative slope means forecast skill drops quickly with longer lead-times). We then plot the performance metric  $I$  against the slope. As shown in Figure S4, there is no clear trend of correlation between the speed with which forecast skill decreases and forecast value.

90

**Text S7.** The Hydrological Climate Classification (HCC) (Knoben et al., 2018) consists of three-dimensional numerical climate indices, that is, aridity, moisture seasonality, and snow fraction. Such indices are derived from climate variables, such as precipitation, temperature, and potential evapotranspiration (CRU TS v3.23), and then evaluated with independent streamflow data. Here, we analyzed the relationships between HCC indices and forecast skills for 735 dams using averaged HCC values  
95 in the grids upstream of each dam. The analysis reveals a few interesting patterns (Figure S5): for example, dams in snowing regions ( $snow \geq 0.2$ ) tend to have good forecasts when seasonality is larger than 0.4 (panel b) or aridity is below 0.4 (panel c).

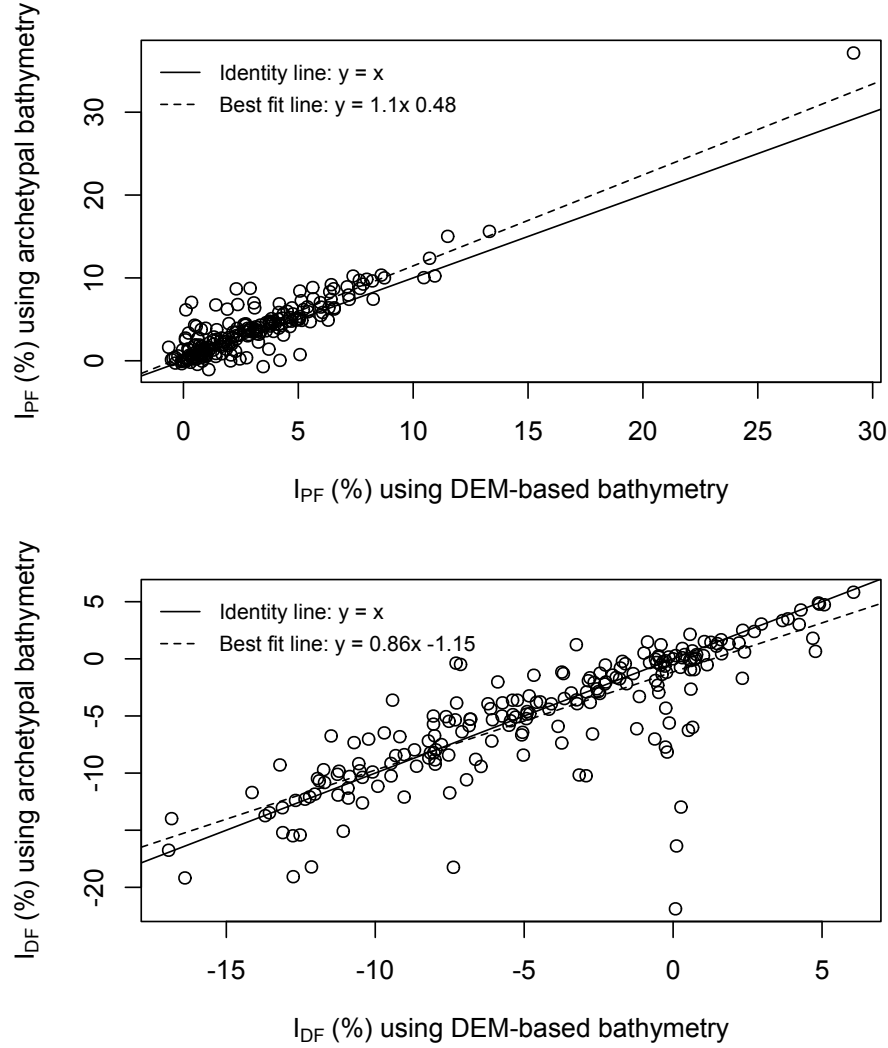

**Figure S1.** Comparison of performance measures ( $I_{PF}$  and  $I_{DF}$ ) for 203 dams whose bathymetry (elevation-area-storage curve) is estimated using two different approaches. The first method assumes an archetypal reservoir shape (Kaveh et al., 2013), while the second method estimates the bathymetry from a high-resolution global hydrography dataset (see Text S1). This comparison is aimed to ensure that Kaveh's method provides a reasonable estimate of the bathymetry for the remaining reservoirs.

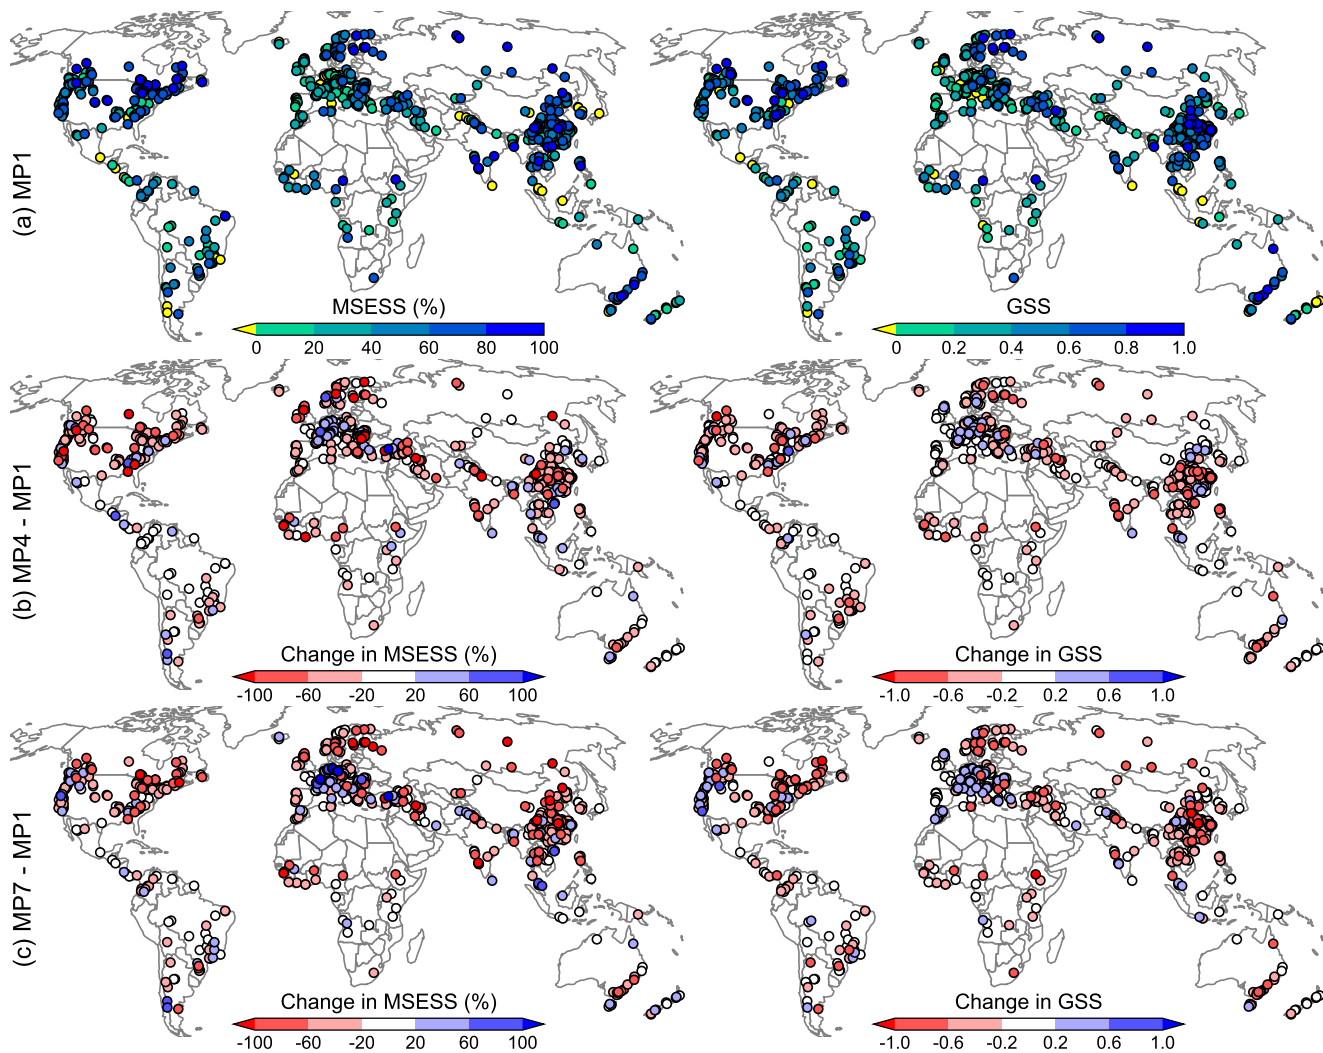

**Figure S2.** MSESS (left) and GSS (right) values for 735 dams. Taking a model with a lead-time of 1 month (MP1) as reference (a), we report the difference between MP1 and MP4 (b) and MP1 and MP7 (c).

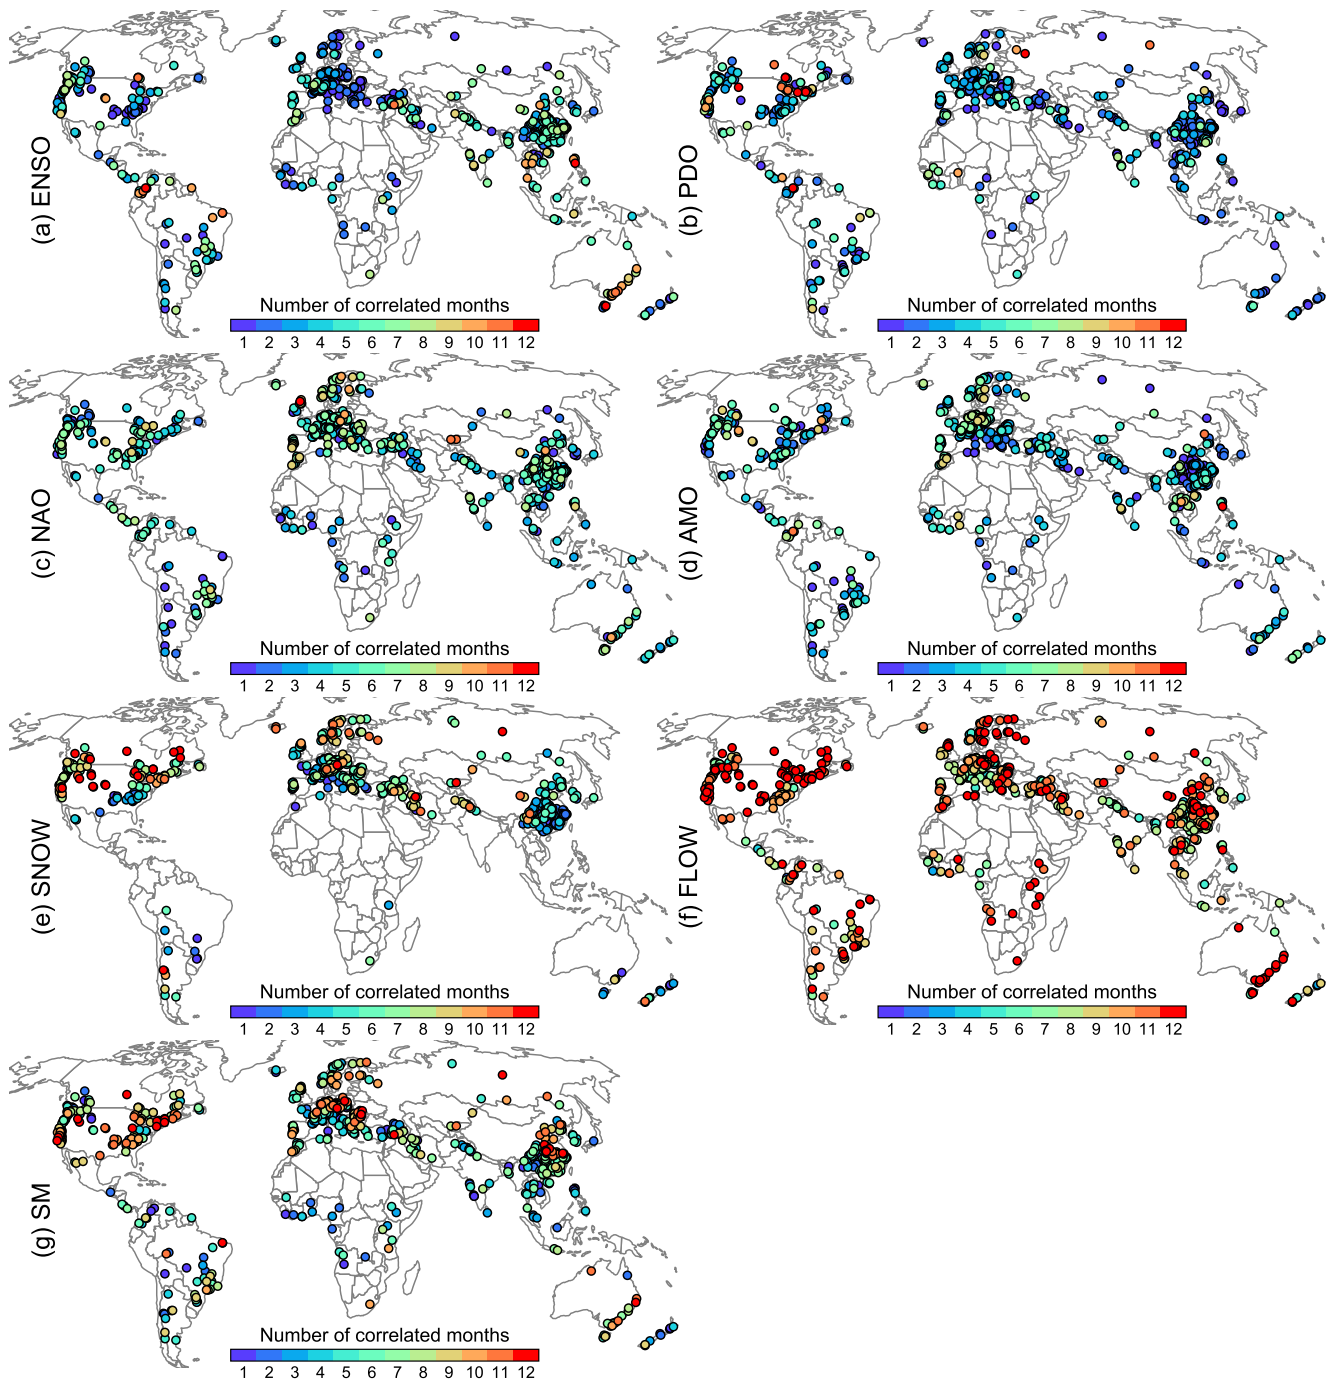

**Figure S3.** Number of months in which the monthly inflow is correlated with the lagged (a) ENSO, (b) PDO, (c) NAO, (d) AMO, and (e) snowfall, and 1-month ahead (f) inflow and (g) soil moisture drivers.



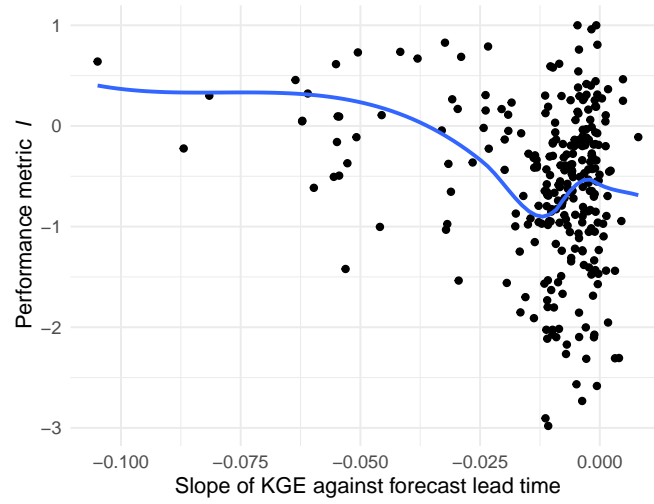

**Figure S4.** Scatter plot contrasting the performance metric  $I$  and slope of KGE against forecast lead time for the 269 dams classified as *cases* (or *success*). The blue line represents the local polynomial regression fitting performed on the data points (i.e., fit at point  $x$  is done using points in the neighborhood of point  $x$ ).

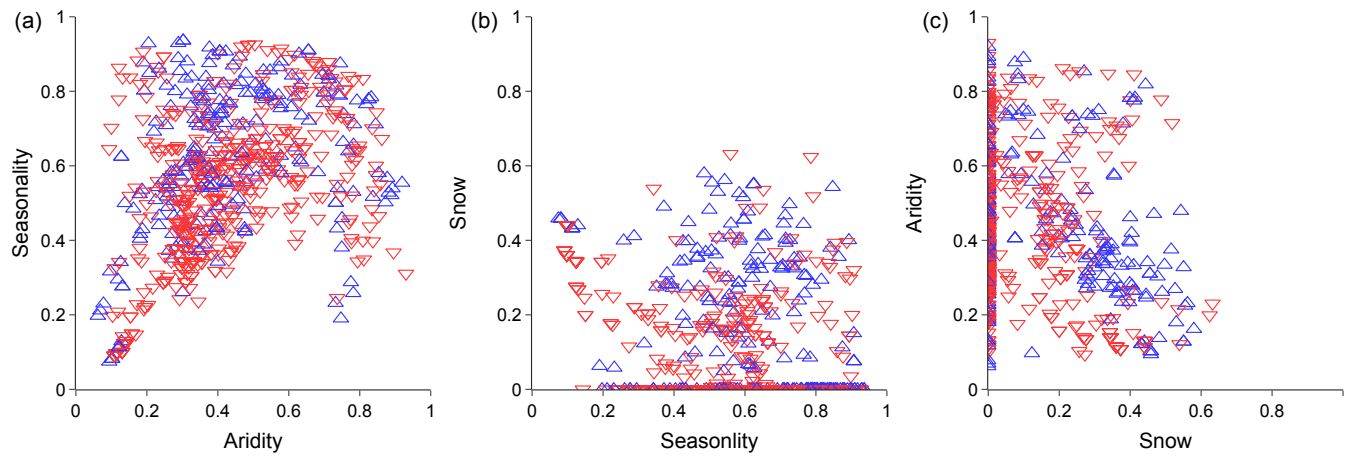

**Figure S5.** Scatterplots contrasting values of the Hydrological Climate Classification indices (Knoben et al., 2018) for 735 dams: (a) seasonality vs aridity, (b) snow vs seasonality, and (c) aridity vs snow. Blue up-pointing (red down-pointing) triangles represent dams with good (poor) forecast skill based on  $X_{MdAPE}$  cutoff value.

**Table S1.** Correlation between dam design specifications and performance gain  $I_{PF}$ .

| No. | Variable          | Description                                          | Correlation with $I_{PF}$ |
|-----|-------------------|------------------------------------------------------|---------------------------|
| 1   | $x_{head}$        | Maximum hydraulic head                               | -0.332                    |
| 2   | $x_{depth}$       | Ratio of max. reservoir depth to max. hydraulic head | 0.362                     |
| 3   | $x_{diff}$        | Max. hydraulic head - max. reservoir depth           | -0.348                    |
| 4   | $\log(x_{empty})$ | Ratio of storage capacity to max. turbine release    | -0.449                    |
| 5   | $\log(x_{fill})$  | Ratio of storage capacity to mean monthly inflow     | -0.613                    |

**Table S2.** Cross-validation scores of alternative formulations of the logistic regression model. The model is used to predict whether the performance gain  $I_{PF}$  is larger than 4.7% (the mean value of  $I_{PF}$  across the 735 dams).

| Model       |   |                  | Accuracy | Kappa | Note                                           |
|-------------|---|------------------|----------|-------|------------------------------------------------|
| $x_{depth}$ | + | $x_{fill}$       | 0.785    | 0.535 | All factors are significant ( $p < 0.01$ )     |
| $x_{depth}$ | + | $\log(x_{fill})$ | 0.776    | 0.503 | All factors are significant ( $p < 0.01$ )     |
| $x_{depth}$ | + | $x_{empty}$      | 0.766    | 0.488 | All factors are significant ( $p < 0.01$ )     |
| $x_{empty}$ | + | $x_{fill}$       | 0.750    | 0.468 | $x_{empty}$ is not significant ( $p = 0.502$ ) |

**Table S3.** Sensitivity of logistic regression results to changes in the threshold used to divide dams into *cases* (or *success*) ( $I_{PF} > \text{threshold}$ ) and *non-cases* (or *failure*) ( $I_{PF} \leq \text{threshold}$ ) groups. Different formulations were tested (as in Table S2), but only models with accuracy higher than the default model are reported.

| Threshold             | <i>Success</i> | <i>Failure</i> | Model       |   |             | Accuracy | Kappa |
|-----------------------|----------------|----------------|-------------|---|-------------|----------|-------|
| 3%                    | 56.2%          | 43.8.4%        | $x_{depth}$ | + | $x_{fill}$  | 0.814    | 0.617 |
| 4.7% (mean $I_{PF}$ ) | 36.6%          | 63.4%          | $x_{depth}$ | + | $x_{fill}$  | 0.785    | 0.535 |
| 7%                    | 19.5%          | 80.5%          | $x_{depth}$ | + | $x_{fill}$  | 0.806    | 0.306 |
| 7%                    | 19.5%          | 80.5%          | $x_{depth}$ | + | $x_{empty}$ | 0.821    | 0.353 |

**Table S4.** Correlation between dam design specifications (or forecast skill) and  $I$ .

| No. | Variable           | Description                                                 | Correlation with $I$ |
|-----|--------------------|-------------------------------------------------------------|----------------------|
| 1   | $x_{head}$         | Maximum hydraulic head                                      | -0.361               |
| 2   | $\log(x_{fill})$   | Ratio of storage capacity to mean monthly inflow            | -0.295               |
| 3   | $x_{exceed}$       | Fraction of time inflow $>$ max. turbine release            | 0.355                |
| 4   | $x_{exceed}^{con}$ | Longest consec. months that inflow $>$ max. turbine release | 0.355                |
| 5   | $x_{high}$         | Longest consec. months that inflow $\geq$ mean inflow       | 0.349                |
| 6   | $x_{hurst}$        | Hurst coefficient of annual inflow                          | 0.262                |
| 7   | $x_{acf}$          | Lag 1 autocorrelation of annual inflow                      | 0.287                |
| 8   | $x_{MARE}$         | Mean absolute relative error                                | -0.315               |
| 9   | $x_{MdAPE}$        | Median absolute percentage error                            | -0.400               |
| 10  | $x_{MRE}$          | Mean relative error                                         | -0.257               |
| 11  | $x_{RSqr}$         | Coefficient of determination                                | 0.251                |
| 12  | $x_{NSE}$          | Nash-Sutcliffe efficiency                                   | 0.252                |
| 13  | $x_{MSLE}$         | Mean squared logarithmic error                              | -0.306               |
| 14  | $x_{VE}$           | Volumetric efficiency                                       | 0.337                |

**Table S5.** Correlation between performance metric  $I$  and forecast skill for the 269 dams that are classified as *cases* (or *success*). Forecast skill is represented by KGE and its three components,  $r$  (correlation),  $\beta$  (bias ratio of mean inflow), and  $\gamma$  (variability ratio). The columns correspond to the prediction model with 1 to 7 months lead-time.

|          | MP1  | MP2  | MP3  | MP4  | MP5  | MP6  | MP7  |
|----------|------|------|------|------|------|------|------|
| KGE      | 0.21 | 0.15 | 0.14 | 0.11 | 0.09 | 0.07 | 0.06 |
| $r$      | 0.23 | 0.16 | 0.15 | 0.12 | 0.10 | 0.08 | 0.06 |
| $\beta$  | 0.17 | 0.20 | 0.16 | 0.16 | 0.19 | 0.20 | 0.17 |
| $\gamma$ | 0.17 | 0.11 | 0.12 | 0.08 | 0.08 | 0.06 | 0.04 |

**Table S6.** Linear regression models for predicting  $I$  using 2–5 explanatory variables.

| Model                                                      | Adj R-squared | Note                                       |
|------------------------------------------------------------|---------------|--------------------------------------------|
| $x_{MdAPE} + x_{exceed}$                                   | 0.310         | All factors are significant ( $p < 0.01$ ) |
| $x_{MdAPE} + x_{exceed} + x_{high}$                        | 0.356         | All factors are significant ( $p < 0.01$ ) |
| $x_{MdAPE} + x_{exceed} + x_{high} + x_{head}$             | 0.392         | All factors are significant ( $p < 0.01$ ) |
| $x_{MdAPE} + x_{exceed} + x_{high} + x_{head} + x_{hurst}$ | 0.407         | All factors are significant ( $p < 0.01$ ) |

## References

- Alcamo, J., Döll, P., Henrichs, T., Kaspar, F., Lehner, B., Rösch, T., and Siebert, S.: Development and testing of the WaterGAP 2 global model of water use and availability, *Hydrological Sciences Journal*, 48, 317–337, 2003.
- 100 Dawson, C. W., Abrahart, R. J., and See, L. M.: HydroTest: a web-based toolbox of evaluation metrics for the standardised assessment of hydrological forecasts, *Environmental Modelling & Software*, 22, 1034–1052, 2007.
- Kaveh, K., Hosseinzadeh, H., and Hosseini, K.: A new equation for calculation of reservoir’s area-capacity curves, *KSCE Journal of Civil Engineering*, 17, 1149–1156, 2013.
- Knoben, W. J., Woods, R. A., and Freer, J. E.: A quantitative hydrological climate classification evaluated with independent streamflow data, 105 *Water Resources Research*, 54, 5088–5109, 2018.
- Nowak, K., Prairie, J., Rajagopalan, B., and Lall, U.: A nonparametric stochastic approach for multisite disaggregation of annual to daily streamflow, *Water Resources Research*, 46, 2010.
- Vu, D., Dang, T., Galelli, S., and Hossain, F.: Satellite observations reveal thirteen years of reservoir filling strategies, operating rules, and hydrological alterations in the Upper Mekong River Basin, *Hydrology and Earth System Sciences Discussions*, 2021, 1–28, 110 <https://doi.org/10.5194/hess-2021-360>, 2021.
- Weedon, G., Gomes, S., Viterbo, P., Shuttleworth, W. J., Blyth, E., Österle, H., Adam, J., Bellouin, N., Boucher, O., and Best, M.: Creation of the WATCH forcing data and its use to assess global and regional reference crop evaporation over land during the twentieth century, *Journal of Hydrometeorology*, 12, 823–848, 2011.
- Wilks, D. S.: *Statistical methods in the atmospheric sciences*, vol. 100, Academic press, 2011.
- 115 Yamazaki, D., Ikeshima, D., Sosa, J., Bates, P. D., Allen, G. H., and Pavelsky, T. M.: MERIT Hydro: A high-resolution global hydrography map based on latest topography dataset, *Water Resources Research*, 55, 5053–5073, 2019.
